# Supplementary material
Source: publisher site journal article supplement (https://www.dovepress.com/article/556396)
Supplement: Supplementary file 1 [file 556396%20Revised%20%2509Supplementary%20File%20S1.docx]

Table S 1 Maternal demographics and general parameters of newborns

| Variables | C Group(n=35) | E Group(n=35) | ED Group(n=35) |  | Standardized difference |  |
| --- | --- | --- | --- | --- | --- | --- |
|  |  |  |  | E vs C | ED vs C | E vs ED |
| Age (years) | 30.7±2.5 | 29.2±1.5 | 30.1±2.9 | 0.49 | 0.62 | 0.43 |
| Height (cm) | 159.1±5.5 | 158.0±5 | 160.5±3 | 0.19 | 0.23 | 0.49 |
| Weight (kg) | 72.6(63-75) | 74.3(65-75) | 70.2(67-75) | 0.38 | 0.17 | 0.19 |
| BMI (kg/m2) | 28.1(25-29) | 29.3(26-30) | 28.0(26-29) | 0.35 | 0.14 | 0.22 |
| Gestation age (week) | 38.7(38-42) | 40.5(38-39) | 39.6(39-40) | 0.23 | 0.12 | 0.26 |
| Education |  |  |  |  |  |  |
| High school or below n (%) | 13(37.1%) | 11(31.4%) | 8(22.9%) | 0.12 | 0.32 | 0.19 |
| Junior college or below n (%) | 10(28.6%) | 14(40.0%) | 16(45.7%) | 0.24 | 0.33 | 0.12 |
| Bachelor or above n (%) | 12(34.3%) | 10(28.6%) | 11(31.4%) | 0.21 | 0.12 | 0.10 |
| Number of births n (%) |  |  |  |  |  |  |
| 0 | 18(51.4%) | 20(57.1%) | 22(62.9%) | 0.31 | 0.23 | 0.11 |
| 1 | 14(40.0%) | 13(37.2%) | 11(31.4%) | 0.06 | 0.19 | 0.12 |
| 2 | 3(8.6%) | 2(5.7%) | 2(5.7%) | 0.06 | 0.31 | 0.16 |
| Surgical duration (min) | 47.3(45-55) | 45.4(45-50) | 52.6(45-52) | 0.38 | 0.25 | 0.19 |
| PSQI | 6.2±1.0 | 5.7±1.4 | 6.0±1.6 | 0.25 | 0.13 | 0.20 |
| HADS-A | 3.7±2.3 | 3.2±2.7 | 3.5±2.4 | 0.20 | 0.08 | 0.11 |
| HADS-D | 4.0±2.1 | 4.2±2.5 | 4.2±2 | 0.09 | 0.10 | 0.13 |
| Newborn sex (m/f) | 21/14 | 19/16 | 15/20 | 0.11 | 0.53 | 0.41 |
| Birthheight (cm) | 48.7±0.8 | 48.5±1.5 | 49.1±1.9 | 0.13 | 0.25 | 0.38 |
| Birthweight(g) | 3228.7±243.2 | 3267.7±305.6 | 3220.2±355.1 | 0.13 | 0.09 | 0.14 |
| 1 min apgar score | 8.9±1.5 | 8.8±0.6 | 8.6±1.2 | 0.46 | 0.33 | 0.21 |
| 5 min apgar score | 9.8±1.0 | 9.5±0.4 | 9.4±0.8 | 0.36 | 0.21 | 0.15 |
| First destination after birth: |  |  |  |  |  |  |
| Postpartum ward n(%) | 31(88.6%) | 33(94.3%) | 32(91.4%) | 0.25 | 0.36 | 0.23 |
| Neonatal ward n(%) | 4(11.4%) | 2(5.7%) | 3(8.6%) | 0.31 | 0.13 | 0.22 |

Data are presented as mean ± standard deviation, median (interquartile range), or n (%).

**Abbreviations**: BMI, Body Mass Index; PSQI, Pittsburgh Sleep Quality Index; HADS-A/D, Hospital Anxiety and Depression Scale-Anxiety/Depression.

Table S 2 Comparison of the Five Components of the RCSQ in the First Three Days Post-Surgery Data

|  |  | C Group  (n=35) | E Group  (n=35) | ED Group  (n=35) | E vs C  *P* value | ED vs C *P* value | E vs ED *P* value |
| --- | --- | --- | --- | --- | --- | --- | --- |
|  | POD1 | 20(15-40) | 30(20-45) | 50(40-65) | =0.241 | <0.001*** | <0.001*** |
| sleep depth | POD2 | 50(30-65) | 60(40-70) | 65(55-75) | =0.288 | =0.07 | =0.491 |
|  | POD3 | 60(50-65) | 70(60-75) | 70(60-75) | =0.66 | =0.17 | =1 |
|  | POD1 | 25(20-60) | 50(25-75) | 60(40-75) | =0.013* | <0.001*** | =0.292 |
| latency to sleep | POD2 | 55(20.4) | 67(17.8) | 65(16.9) | =0.007** | =0.029** | =0.605 |
|  | POD3 | 60(55-70) | 75(60-80) | 70(55-80) | =0.004** | =0.012* | =0.777 |
|  | POD1 | 20(15-35) | 30(25-45) | 35(25-45) | =0.028* | <0.001*** | =0.682 |
| Awakenings during sleep | POD2 | 50(30-65) | 55(40-65) | 65(50-70) | =0.285 | =0.16 | =0.789 |
|  | POD3 | 55±15.1 | 60±14.1 | 64±17.1 | =0.192 | =0.21 | =0.376 |
|  | POD1 | 25(20-60) | 45(30-75) | 60(40-80) | =0.35 | <0.001*** | =0.31 |
| return to sleep | POD2 | 60(40-70) | 70(60-75) | 70(60-80) | =0.052 | =0.005** | =1 |
|  | POD3 | 60(55-70) | 70(60-75) | 70(55-80) | >0.05 | >0.05 | >0.05 |
|  | POD1 | 30(15-45) | 40(30-60) | 55(45-70) | =0.005** | <0.001*** | =0.31 |
| sleep quality | POD2 | 55(35-63) | 65(55-70) | 65(55-75) | =0.02* | =0.005** | =1 |
|  | POD3 | 60(50-70) | 65(55-75) | 70(60-75) | >0.05 | >0.05 | >0.05 |

Data are presented as mean ± standard deviation, median (interquartile range) **P* < 0.05, ** *P* < 0.01, *** *P* < 0.001

**Abbreviation**: POD, postoperative days; RCSQ, Richards Campbell Sleep Questionnaire

Table S 3 Incidence and Proportion of Adverse Events Among the Three Study Groups

| Variable | C Group  (n=35) | E Group  (n=35) | ED Group  (n=35) | *P* value |
| --- | --- | --- | --- | --- |
| Adverse events,n(%) |  |  |  |  |
| Nausea and Vomiting | | 2(5.71%) | | --- | | | 4 (11.4%) | | --- | | | 4 (11.4%) | | --- | | =0.767 |
| Dizziness | 5 (14.3%) | 6 (17.1%) | 6 (17.1%) | =0.932 |
| Pruritus | 2 (5.7%) | 3 (8.6%) | 0 (0%) | =0.366 |
| Hypersomnia | 2 (5.7%) | 1 (2.86%) | 1 (2.86%) | =1.000 |
| Respiratory depression | 0 (0%) | 0 (0%) | 0 (0%) | =1.000 |
| Hypotension | 0 (0%) | 0 (0%) | 0 (0%) | =1.000 |
| Bradycardia | 0 (0%) | 0 (0%) | 0 (0%) | =1.000 |

Table S 4 Comparison of Ramsay Sedation Scores at Different Time Points Among the Three Study Groups

| Ramsay | C Group  (n=35) | E Group  (n=35) | ED Group  (n=35) | *P* |
| --- | --- | --- | --- | --- |
| 6h | 2.3 ± 0.5 | 2.5 ± 0.9 | 2.6 ± 0.8 | = 0.231 |
| 12h | 2.3 ± 1.2 | 2.5 ± 1.5 | 2.5 ± 0.7 | = 0.278 |
| 24h | 2.2 ± 1.0 | 2.3 ± 0.6 | 2.4 ± 1.8 | = 0.314 |
| 48h | 2.1 ± 0.6 | 2.2 ± 0.4 | 2.2 ± 1.3 | = 0.352 |
| 72h | 2.0 ± 0.8 | 2.1 ± 0.3 | 2.1 ± 0.4 | = 0.487 |
